# Supplementary material for: Ethynylene-linked benzo[1,2-b:4,5-b′]dithiophene-alt-diketopyrrolopyrrole alternating copolymer: optoelectronic properties, film morphology and photovoltaic applications
Source: Royal Society of Chemistry journal article supplement (doi:10.1039/c5ta01004g), 2015-01-01
Supplement: c5ta01004g1.pdf [file c5ta01004g1.pdf]

# Benzo[1,2-*b*:4,5-*b'*]dithiophene-*alt*-Diketopyrrolopyrrole Alternating Copolymer: Optoelectronic Properties, Film Morphology and Photovoltaic Applications

Hongyu Wang,<sup>a,b,\*</sup> Yimin Ding,<sup>a</sup> Yanbang Lai,<sup>a</sup> Zhiwei Sun,<sup>d</sup> Yao Liu,<sup>d</sup>  
Bin Jiang,<sup>a</sup> Ming Chen,<sup>a</sup> Jian Yao,<sup>a</sup> Feng Liu,<sup>c,\*</sup> Thomas P Russell<sup>c, d,\*</sup>

## Supporting Information

1. <sup>1</sup>H NMR spectrum of **EDPP**.
2. FTIR spectrum of **EDPP**.
3. GPC curve of **EDPP**.
4. TGA curve of **EDPP** with a heating rate of 10 °C min<sup>-1</sup> under N<sub>2</sub>.
5. DSC curves of **EDPP** with a heating rate of 10 °C min<sup>-1</sup> under N<sub>2</sub>.
6. Table S1. Photovoltaic properties of ITO/PEDOT:PSS/**EDPP**:PC<sub>71</sub>BM/LiF/Al solar cells with 1,8-diiodooctane (DIO).

---

<sup>a</sup> Department of Chemistry, Shanghai University, Shanghai 200444, China. E-mail: wanghy@shu.edu.cn

<sup>b</sup> State Key Laboratory of Molecular Engineering of Polymers (Fudan University), Shanghai 200433, China

<sup>c</sup> Materials Sciences Division, Lawrence Berkeley National Laboratory, Berkeley, CA, 94720, USA. Email: iamfengliu@gmail.com

<sup>d</sup> Department of Polymer Science and Engineering, University of Massachusetts, Amherst, MA, 01003, USA. Email: Russell@mail.pse.umass.edu

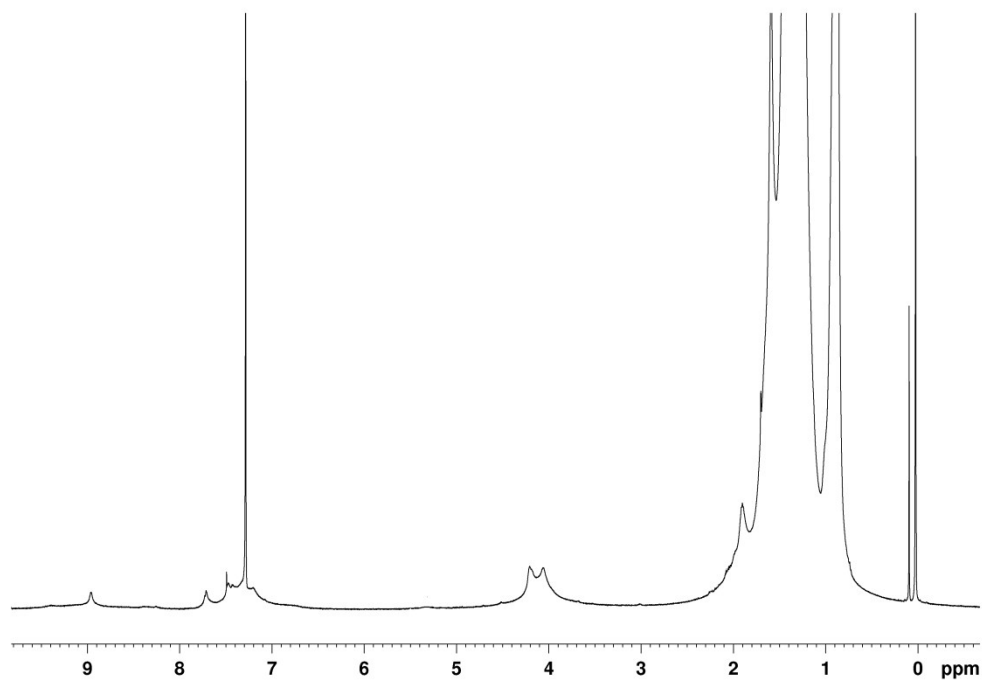

**Figure S1.**  $^1\text{H}$  NMR spectrum of EDPP.

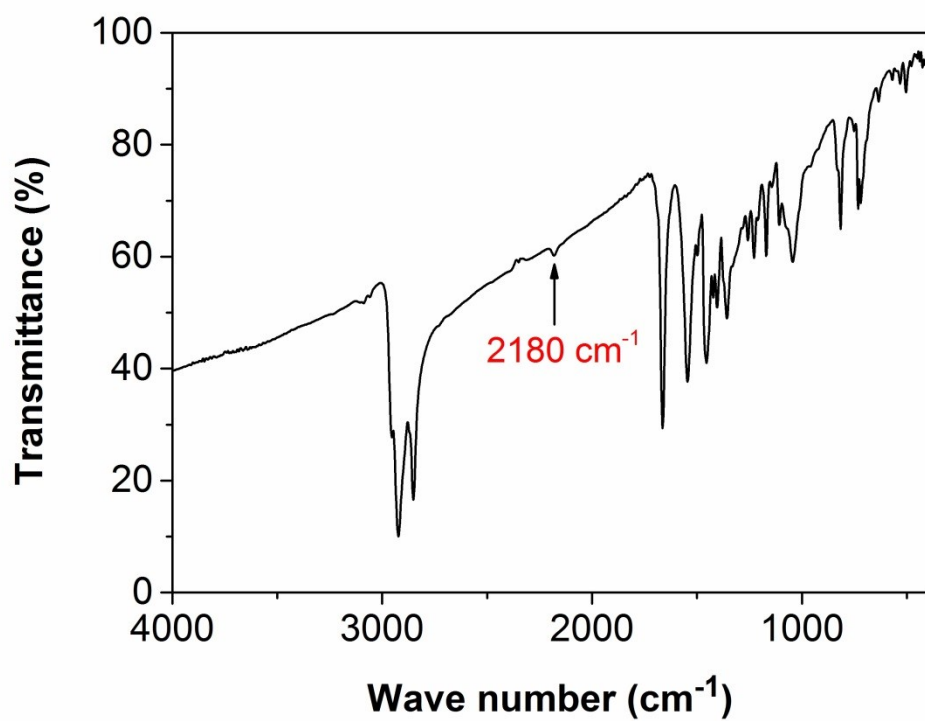

**Figure S2.** FTIR spectrum of EDPP.

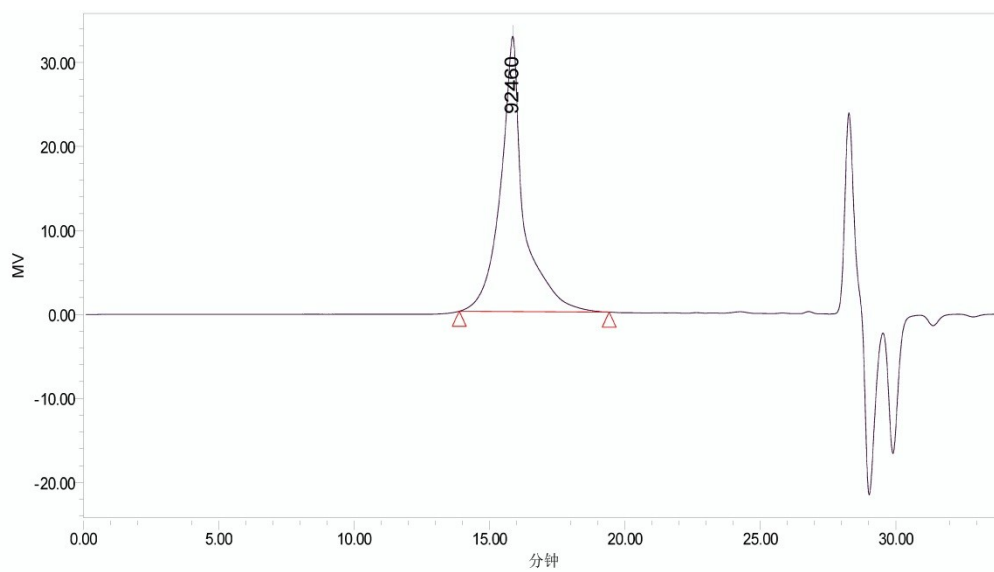

**GPC Results**

| Dist Name | Elution Volume (ml) | Retention Time (min) | Adjusted RT (min) | Mn    | Mw     | MP    | Mz     | Mz+1   | Mz/Mw    | Mz+1/Mw  |
|-----------|---------------------|----------------------|-------------------|-------|--------|-------|--------|--------|----------|----------|
| 1         | 15.858              | 15.858               | 15.858            | 46379 | 118607 | 92460 | 212724 | 309058 | 1.793519 | 2.605728 |

**Figure S3.** GPC curve of **EDPP**.

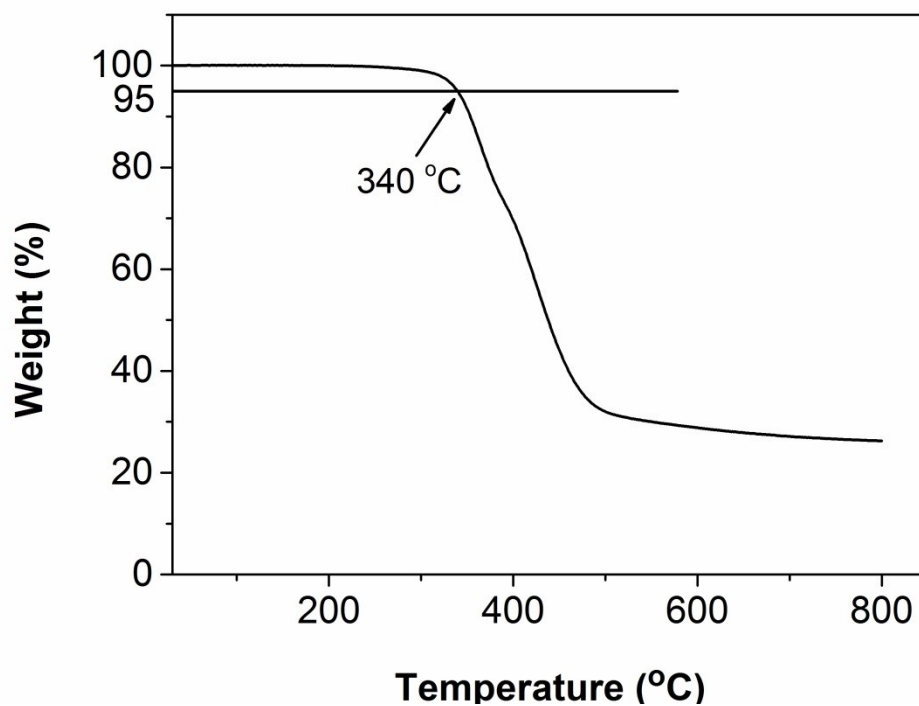

**Figure S4.** TGA curve of **EDPP** with a heating rate of  $10\text{ }^{\circ}\text{C min}^{-1}$  under  $\text{N}_2$ .

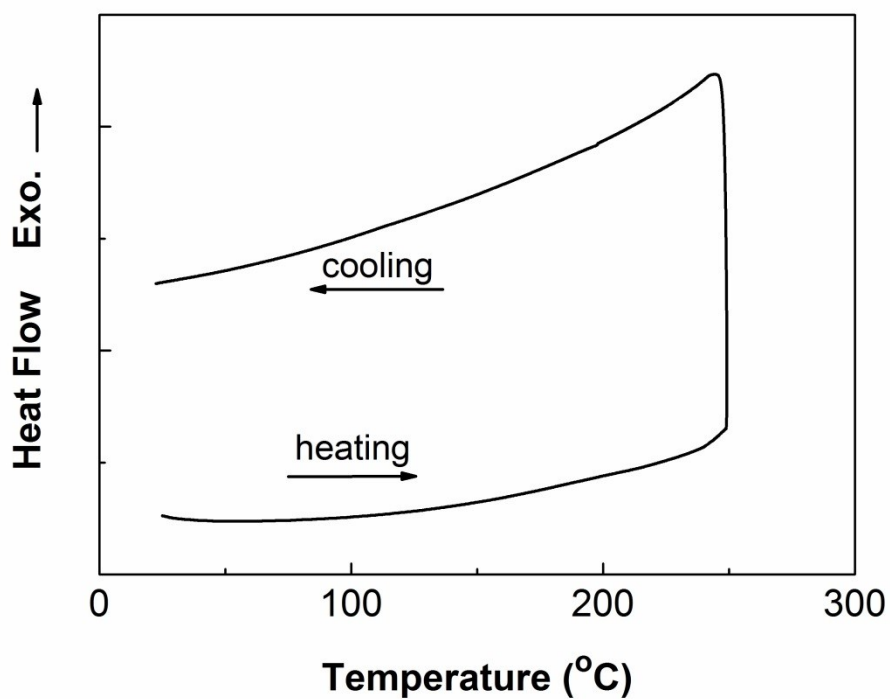

**Figure S5.** DSC curves of **EDPP** with a heating rate of 10 °C min<sup>-1</sup> under N<sub>2</sub>.

**Table S1.** Photovoltaic properties of ITO/PEDOT:PSS/**EDPP**:PC<sub>71</sub>BM/LiF/Al solar cells with 1,8-diiodooctane (DIO).

| Blend ratios of                  | Solvent        | $V_{oc}$ | $J_{sc}$               | FF  | PCE   |
|----------------------------------|----------------|----------|------------------------|-----|-------|
| <b>EDPP</b> :PC <sub>71</sub> BM |                | (V)      | (mA cm <sup>-2</sup> ) | (%) | (%)   |
| EDPP:PCBM=1:1                    | DCB + 3 v% DIO | 0.665    | 0.765                  | 45  | 0.879 |
| EDPP:PCBM=1:2                    | DCB + 3 v% DIO | 0.565    | 0.650                  | 38  | 0.747 |
